# Supplementary material
Source: PubMed Central journal article supplement (PMC3918500)
Supplement: NIHMS538538-supplement-ESI.pdf [file NIHMS538538-supplement-ESI.pdf]

## Supplementary Information

### Resonance Energy Transfer Between Fluorescent BSA Protected Au Nanoclusters and Organic Fluorophores

Sangram Raut,<sup>\*a</sup> Ryan Rich<sup>a</sup>, Rafal Fudala, Susan Butler<sup>a</sup>, Rutika Kokate<sup>a</sup>, Zygmunt Gryczynski<sup>ac</sup>, Rafal Luchowski<sup>d</sup>, and Ignacy Gryczynski<sup>\*ae</sup>

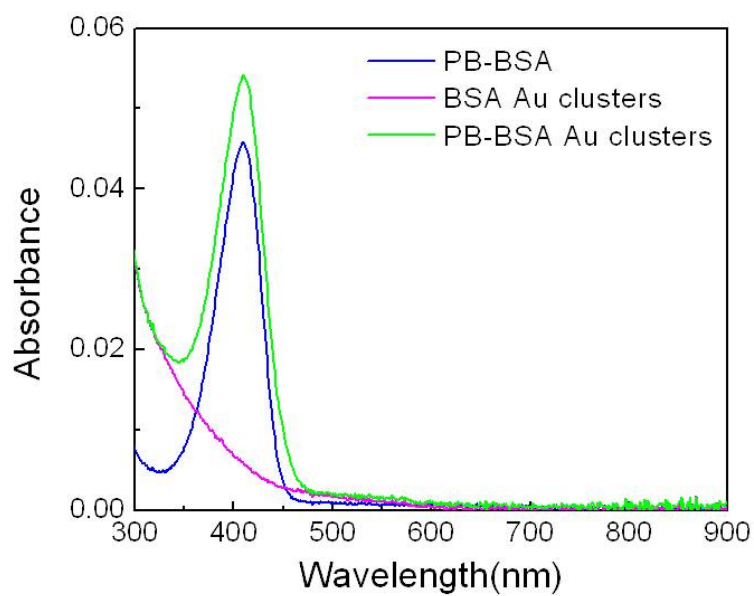

**Supplementary Figure 1:** Absorption spectrum of PB-BSA (blue), BSA Au clusters (magenta) and PB conjugated BSA Au clusters (green). Care was taken to match the absorptions of control samples with PB-conjugated BSA Au clusters

## Supplementary Information

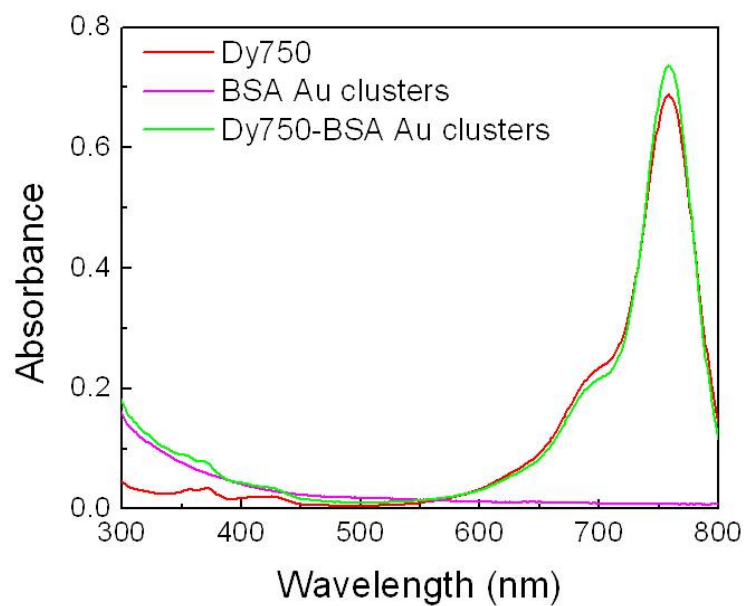

**Supplementary Figure 2:** Absorption spectrum of Dy750-BSA (red), BSA Au clusters (magenta) and Dy750 conjugated BSA Au clusters (green). Care was taken to match the absorptions of control samples with Dy750 conjugated BSA Au clusters.
